# Supplementary material for: Synergistic effect of sea cucumber saponins and EPA-enriched phospholipids on insulin resistance in high-fat diet-induced obese mice
Source: Royal Society of Chemistry journal article supplement (doi:10.1039/c9fo01147a), 2019-01-01
Supplement: c9fo01147a1.pdf [file c9fo01147a1.pdf]

**Table S1. Main fatty acid compositions of EPA-PL**

| Fatty acid composition (%) | EPA-PL       |
|----------------------------|--------------|
| C16:0                      | 5.23 ± 0.43  |
| C16:1n-9                   | 1.59 ± 0.13  |
| C17:0                      | 0.92 ± 0.06  |
| C18:2n-6                   | 2.60 ± 0.23  |
| C18:3n-6                   | 1.74 ± 0.16  |
| C20:0                      | 1.77 ± 0.14  |
| C20:3                      | 14.92 ± 1.14 |
| C20:4n-6 (AA)              | 0.30 ± 0.03  |
| C20:5n-3 (EPA)             | 59.73 ± 3.83 |
| C22:6n-3 (DHA)             | 1.51 ± 0.11  |
| C23:0                      | 0.45 ± 0.02  |
| ∑PUFA                      | 65.88        |
| ∑n-3 PUFA                  | 61.24        |
| ∑n-6 PUFA                  | 4.64         |

**Table S2. Composition of experimental diets**

| Ingredient composition<br>(g/kg) | LF    | HF    | C0.5   | SCS   | EPA-PL |
|----------------------------------|-------|-------|--------|-------|--------|
| <b>Casein</b>                    | 200   | 200   | 200    | 200   | 200    |
| <b>Fructose</b>                  | -     | 200   | 200    | 200   | 200    |
| <b>Corn starch</b>               | 649.5 | 249.5 | 246.15 | 248.8 | 243.5  |
| <b>Lard</b>                      | 200   | 200   | 200    | 191   | 182    |
| <b>Corn oil</b>                  | 50    | 50    | 50     | 50    | 50     |
| <b>Powdered cellulose</b>        | 50    | 50    | 50     | 50    | 50     |
| <b>Mineral mix</b>               | 35    | 35    | 35     | 35    | 35     |
| <b>Vitamin mix</b>               | 10    | 10    | 10     | 10    | 10     |
| <b>DL-Methionine</b>             | 3     | 3     | 3      | 3     | 3      |
| <b>Choline bitartrate</b>        | 2     | 2     | 2      | 2     | 2      |
| <b>SCS</b>                       | -     | -     | 0.35   | 0.7   | -      |
| <b>EPA-PL</b>                    | -     | -     | 12     | -     | 24     |

a) Low-fat diet (LF); High-fat diet (HF); High-fat diet plus 0.035% SCS and 1.2% EPA-PL (C0.5); High-fat diet plus 0.07% SCS (SCS); High-fat diet plus 2.4% EPA-PL (EPA-PL).

b) – not detected.

**Table S3. Sequences of the primers used in quantitative real-time PCR**

| <b>Gene</b>    | <b>Forward primer</b>    | <b>Reverse primer</b>   |
|----------------|--------------------------|-------------------------|
| FAS            | GTCTGGAAAGCTGAAGGATCTC   | TGCCTCTGAACCACTCACAC    |
| ACOX1          | GTATAAACTCTTCCCGCTCCTG   | CCAGGTAGTAAAAGCCTTCAGC  |
| cPLA2a         | CCTTTGAGTTCATTTGGATCCTAA | TGTAGCTGTGCCTAGGGTTTCAT |
| COX1           | GGAGAGAAAGAAATGGCTGC     | ACCCGTCATCTCCAGGGTAA    |
| COX2           | AGAAGGAAATGGCTGCAGAA     | GCTCGGCTTCCAGTATTGAG    |
| F4/80          | CCTGATGGTGAGAAACCTGA     | CCCCAGGAAACTCCAGATAA    |
| S100A8         | ATTCCATGCCGTCTACAGG      | CACCAGAATGAGGAACTCCT    |
| S100A9         | TCAAAGAGCTGGTGCGAAAA     | AACTCCTCGAAGCTCAGCTG    |
| MCP1           | AGCTCTCTCTTCCACCA        | CTACAGCTTCTTTGGGACACC   |
| $\beta$ -Actin | CAGGCATTGCTGACAGGATG     | TGCTGATCCACATCTGCTGG    |
